# Supplementary material for: Increased Risk of Respiratory Mortality Associated with the High-Tech Manufacturing Industry: A 26-Year Study
Source: MDPI journal article supplement (doi:10.3390/ijerph13060557), 2016-06-03
Supplement: s1 [file s1]

# Supplementary Materials: Increased Risk of Respiratory Mortality Associated with the High-Tech Manufacturing Industry: A 26-Year Study

Ro-Ting Lin, David C. Christiani, Ichiro Kawachi, Ta-Chien Chan, Po-Huang Chiang, Chang-Chuan Chan

**Table S1.** Industries in each science park and their turnovers <sup>1</sup> in 2015 [1].

| Science Parks                              | Integrated Circuits         | Optoelectronics             | Precision Machinery       | Computers and Peripherals | Telecommunications        | Biotechnology            | Other                    | Total                          |
|--------------------------------------------|-----------------------------|-----------------------------|---------------------------|---------------------------|---------------------------|--------------------------|--------------------------|--------------------------------|
| All                                        | 14,472.32<br>(62.69%)       | 6700.61<br>(29.03%)         | 819.94<br>(3.55%)         | 420.88<br>(1.82%)         | 381.36<br>(1.65%)         | 191.43<br>(0.83%)        | 98.36<br>(0.43%)         | 23,084.90<br>(100.00%)         |
| <b>Hsinchu Science Park (HSP)</b>          | <b>8009.38<br/>(72.73%)</b> | <b>1894.51<br/>(17.20%)</b> | <b>276.60<br/>(2.51%)</b> | <b>373.83<br/>(3.39%)</b> | <b>305.44<br/>(2.77%)</b> | <b>91.29<br/>(0.83%)</b> | <b>61.32<br/>(0.56%)</b> | <b>11,012.37<br/>(100.00%)</b> |
| Hsinchu Science Park                       | 7787.74<br>(81.27%)         | 814.47<br>(8.50%)           | 189.05<br>(1.97%)         | 366.37<br>(3.82%)         | 304.00<br>(3.17%)         | 59.97<br>(0.63%)         | 61.32<br>(0.64%)         | 9582.93<br>(100.00%)           |
| Jhunan Science Park                        | 129.08<br>(17.82%)          | 473.56<br>(65.39%)          | 87.54<br>(12.09%)         | 2.26<br>(0.31%)           | 1.44<br>(0.20%)           | 30.32<br>(4.19%)         | -                        | 724.20<br>(100.00%)            |
| Longtan Science Park                       | 63.26<br>(9.45%)            | 606.48<br>(90.55%)          | -                         | -                         | -                         | -                        | -                        | 669.74<br>(100.00%)            |
| Biomedical Park                            | -                           | -                           | -                         | -                         | -                         | 1.00<br>(100.00%)        | -                        | 1.00<br>(100.00%)              |
| Tongluo Science Park                       | 29.30<br>(84.93%)           | -                           | -                         | 5.20<br>(15.07%)          | -                         | -                        | -                        | 34.50<br>(100.00%)             |
| Yilan Science Park                         | -                           | -                           | -                         | -                         | -                         | -                        | -                        | -                              |
| <b>Southern Taiwan Science Park (STSP)</b> | <b>3699.66<br/>(51.73%)</b> | <b>2952.72<br/>(41.29%)</b> | <b>307.70<br/>(4.30%)</b> | <b>16.06<br/>(0.22%)</b>  | <b>74.82<br/>(1.05%)</b>  | <b>76.15<br/>(1.06%)</b> | <b>24.26<br/>(0.34%)</b> | <b>7151.37<br/>(100.00%)</b>   |
| Tainan Science Park                        | 3694.98<br>(55.59%)         | 2599.97<br>(39.12%)         | 196.71<br>(2.96%)         | 4.43<br>(0.07%)           | 74.82<br>(1.13%)          | 68.21<br>(1.03%)         | 7.52<br>(0.11%)          | 6646.64<br>(100.00%)           |
| Kaohsiung Science Park                     | 4.69<br>(0.93%)             | 352.75<br>(69.89%)          | 110.99<br>(21.99%)        | 11.63<br>(2.30%)          | -                         | 7.94<br>(1.57%)          | 16.73<br>(3.31%)         | 504.73<br>(100.00%)            |

Table S1. Cont.

| Science Parks                      | Integrated Circuits | Optoelectronics     | Precision Machinery | Computers and Peripherals | Telecommunications | Biotechnology     | Other            | Total                |
|------------------------------------|---------------------|---------------------|---------------------|---------------------------|--------------------|-------------------|------------------|----------------------|
| Central Taiwan Science Park (CTSP) | 2763.28<br>(56.15%) | 1853.39<br>(37.66%) | 235.65<br>(4.79%)   | 30.99<br>(0.63%)          | 1.10<br>(0.02%)    | 23.99<br>(0.49%)  | 12.78<br>(0.26%) | 4921.17<br>(100.00%) |
| Taichung Science Park              | 2433.44<br>(60.04%) | 1412.01<br>(34.84%) | 168.82<br>(4.17%)   | 11.39<br>(0.28%)          | 1.10<br>(0.03%)    | 15.05<br>(0.37%)  | 11.04<br>(0.27%) | 4052.86<br>(100.00%) |
| Huwei Science Park                 | -                   | 57.72<br>(61.13%)   | 15.38<br>(16.29%)   | 17.70<br>(18.75%)         | -                  | 1.89<br>(2.00%)   | 1.74<br>(1.84%)  | 94.42<br>(100.00%)   |
| Houli Science Park                 | 329.84<br>(43.12%)  | 383.66<br>(50.16%)  | 51.44<br>(6.72%)    | -                         | -                  | -                 | -                | 764.94<br>(100.00%)  |
| Erling Science Park                | -                   | -                   | -                   | -                         | -                  | 7.00<br>(100.00%) | -                | 7.00<br>(100.00%)    |
| Advanced Research Park             | -                   | -                   | -                   | 1.89<br>(97.42%)          | -                  | 0.05<br>(2.58%)   | -                | 1.94<br>(100.00%)    |

<sup>1</sup> Unit: hundred million in New Taiwan Dollars (NTD); one NTD = 0.0313 United States Dollars (USD) in 2015 [2].

## References

1. Ministry of Science and Technology, Taiwan. Science Parks: Common Statistics Form. Available online: <https://ap0512.most.gov.tw/WAS2/English/AsScienceParKE.aspx> (accessed on 28 February 2016).
2. Central Bank of the Republic of China, Taiwan. New Taiwan Dollar Exchange Rates. Available online: <http://www.pxweb.cbc.gov.tw/dialog/statfile1L.asp?lang=1&strList=L> (accessed on 1 February 2016).

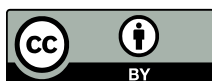

© 2016 by the authors; licensee MDPI, Basel, Switzerland. This article is an open access article distributed under the terms and conditions of the Creative Commons by Attribution (CC-BY) license (<http://creativecommons.org/licenses/by/4.0/>).
